# Supplementary material for: Multidirectional-charge-transfer urchin-type Mo-doped W18O49 nanostructures on CdS nanorods for enhanced photocatalytic hydrogen evolution
Source: Royal Society of Chemistry journal article supplement (doi:10.1039/c7cy02162c), 2018-01-01
Supplement: c7cy02162c1.pdf [file c7cy02162c1.pdf]

## *Electronic Supplementary Information*

**Multidirectional-charge-transfer urchin-type Mo-doped W18O49  
nanostructures on CdS nanorods for enhanced photocatalytic hydrogen  
evolution**

P. Bhavani,<sup>a</sup> D. Praveen Kumar,<sup>a</sup> Seonghyun Jeong,<sup>b</sup> Eun Hwa Kim,<sup>a</sup> Hanbit Park,<sup>a</sup>

Sangyeob Hong,<sup>a</sup> Madhusudana Gopannagari,<sup>a</sup> D. Amaranatha Reddy,<sup>a</sup>

Jae Kyu Song<sup>\*b</sup> and Tae Kyu Kim<sup>\*a</sup>

<sup>a</sup> *Department of Chemistry and Chemical Institute for Functional Materials, Pusan National  
University, Busan 46241, Republic of Korea*

<sup>b</sup> *Department of Chemistry, Kyung Hee University, Seoul 17104, Republic of Korea*

---

\*Corresponding authors. E-mail) tkkim@pusan.ac.kr (T.K.K.) and jaeksong@khu.ac.kr (J.K.S.)

## Experimental Details

**Photocatalytic H<sub>2</sub> production:** The photocatalytic H<sub>2</sub> production reactions were evaluated in a 135 mL quartz reactor at ambient conditions. Typically, 1.0 mg of the photo catalyst was dispersed in 15 mL of aqueous solution containing 20% lactic acid (LA), and it act as a sacrificial reagent. Then, the reactor was closed with a gas-tight rubber septum. Prior to irradiation, the suspension was evacuated and outgassing with Argon (Ar) gas for 30 min to remove air. A solar simulator equipped with an AM 1.5 G filter and 150 W Xenon lamp (Abet Technologies) was used as the irradiation source. The output light intensity was adjusted to 1 sun (100 W/m<sup>2</sup>) using 15151 low-cost calibrated Si reference cell (ABET technologies). The experiments were repeated in three times to check reproducibility. Every test was carried out as described above for 3 h under irradiation source. The H<sub>2</sub> gas production was analyzed using an off-line gas chromatograph (GC, Young Lin Autochro-3000, model 4900) equipped with a thermal conductivity detector (TCD) and a 5 Å molecular sieve column. The generated H<sub>2</sub> gas (100 μL) was collected at the headspace of quartz reactor, and purged into the GC, and evaluated by a calibration plot to 5 % standard gas of H<sub>2</sub>.

The apparent quantum efficiency (QE) was calculated by the following equation.

$$\begin{aligned} \text{QE} &= \frac{\text{number of reacted electrons}}{\text{number of incident photons}} \times 100 (\%) \\ &= \frac{(\text{number of evolved H}_2 \text{ molecules}) \times 2}{\text{number of incident photons}} \times 100 (\%) \end{aligned}$$

Here the QE was measured under the same photocatalytic hydrogen evolution experimental conditions except the irradiation source, here 150 W Xe lamp with 425 nm band pass filter having 7 optical density greater than 4 in the rejection band and slope factor less than 1 %, were used as

light sources, instead of the solar simulator. The output light intensity was measured using 15151 low-cost calibrated Si reference cell (ABET technologies). The liquid level is ~16 cm far from the window of lamp and the illuminated area is 21.24 cm<sup>2</sup>.

**Photo-electrochemical measurements:** Photo-electrochemical studies were obtained in a three-electrode system by CHI 617B electrochemical workstation. A solar simulator equipped with an AM 1.5G filter and 150 W Xe lamp (Abet Technologies) was used as the irradiation source to produce monochromatic illuminating light. The output light intensity was adjusted to 1 sun (100 W/m<sup>2</sup>) using 15151 low cost calibrated Si reference cell (ABET technologies). The reference and counter electrodes were Ag/AgCl and platinum wire, respectively, and 0.5 M Na<sub>2</sub>SO<sub>4</sub> aqueous solution served as the electrolyte. The measured pH value is 6.72. To prepare the working electrode, the as-synthesized 10 mg of CdS and MWO/CdS nanocomposites were first dispersed into ethanol (450  $\mu$ L) and 50  $\mu$ L of Nafion mixtures under soft ultrasonic stirring to get a uniform suspension. The solution containing the catalyst (30  $\mu$ L) was dropped onto the pretreated indium–tin oxide (ITO) conductor glass substrate, which was then dried in an oven at 80 °C for 3 h. Photoresponses were measured at 0.0 V during on-off cycling of the solar simulator. Electrochemical impedance spectroscopy (EIS) was carried out at open-circuit potential over the frequency range of 105 and 10<sup>-1</sup> Hz with an AC voltage magnitude of 5 mV. Moreover, to evaluate the flat-band potential (VFB) of the CdS and MWO/CdS Mott–Schottky plots at a frequency of 1 kHz were measured using a standard potentiostat equipped with an impedance spectra analyzer in the same electrochemical configuration and electrolyte under the dark condition. The measured potentials versus Ag/AgCl were converted to the normal hydrogen electrode (NHE) scale by  $E_{\text{NHE}} = E_{\text{Ag/AgCl}} + 0.197$ . The cyclic voltammograms (CV) were measured with a scanning rate of 10 mV/s using whereas the electrolyte was consisting of 0.1M Na<sub>2</sub>SO<sub>4</sub> aqueous solution with 1mM K<sub>3</sub>[Fe(CN)<sub>6</sub>].<sup>1</sup>

## Supporting Figures

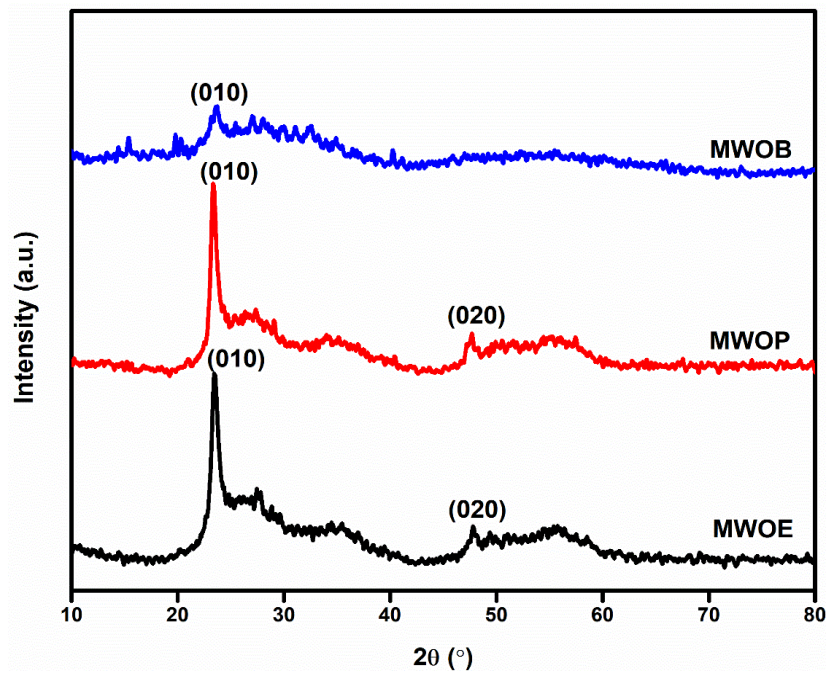

**Figure S1.** XRD patterns of MWOE, MWOP and MWOB nanocomposites.

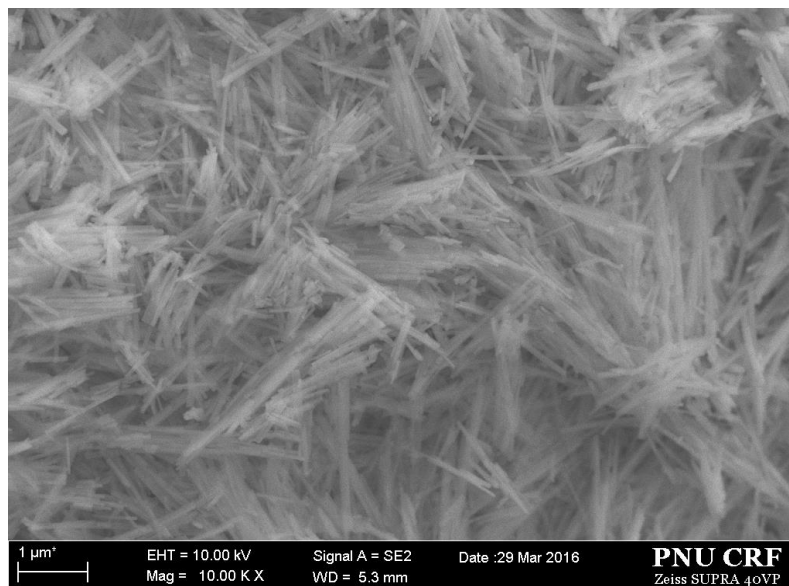

**Figure S2.** SEM image of CdS nanorods.

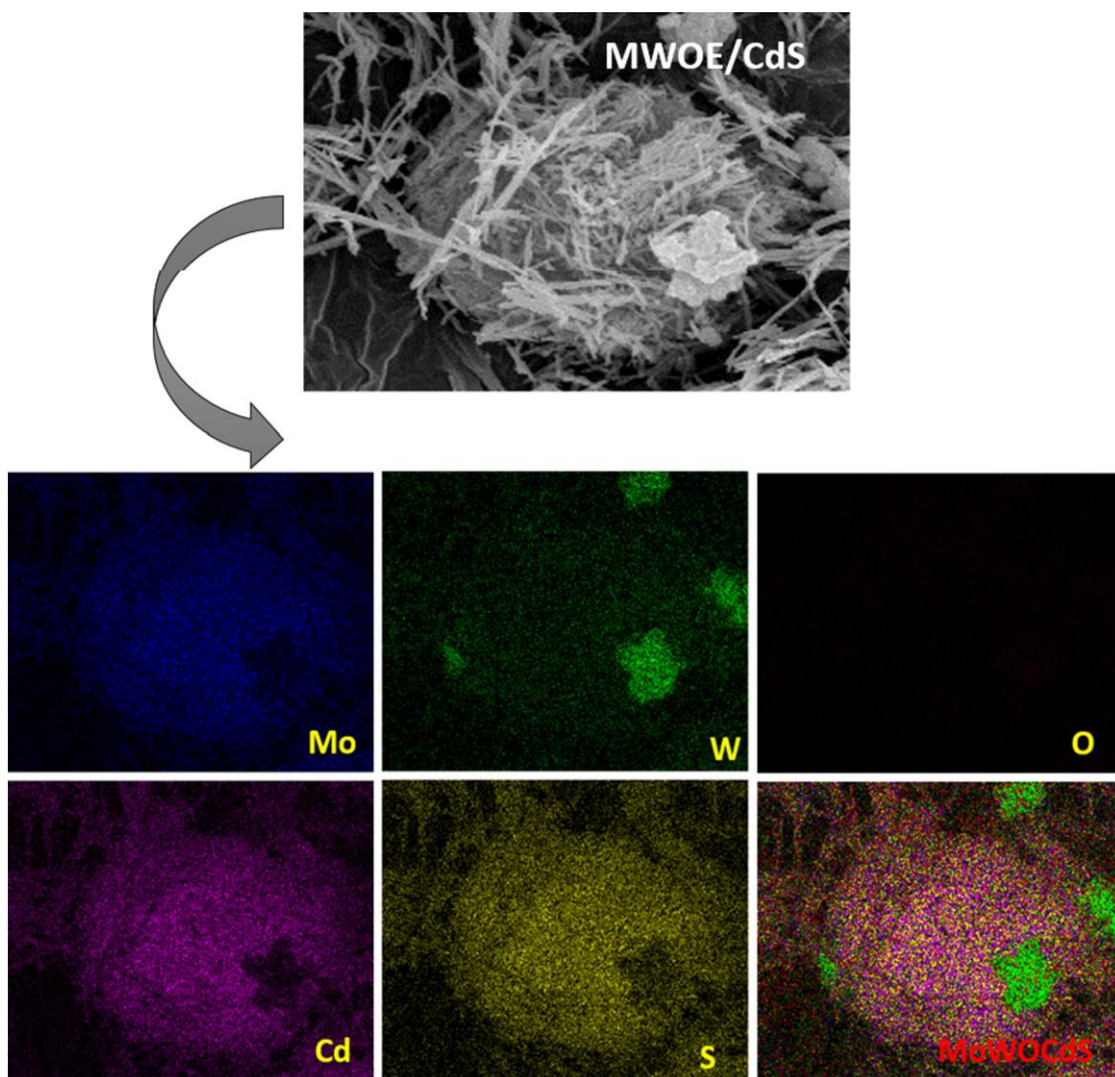

**Figure S3.** FESEM images and EDS elemental mapping analyses of MWOE/CdS.

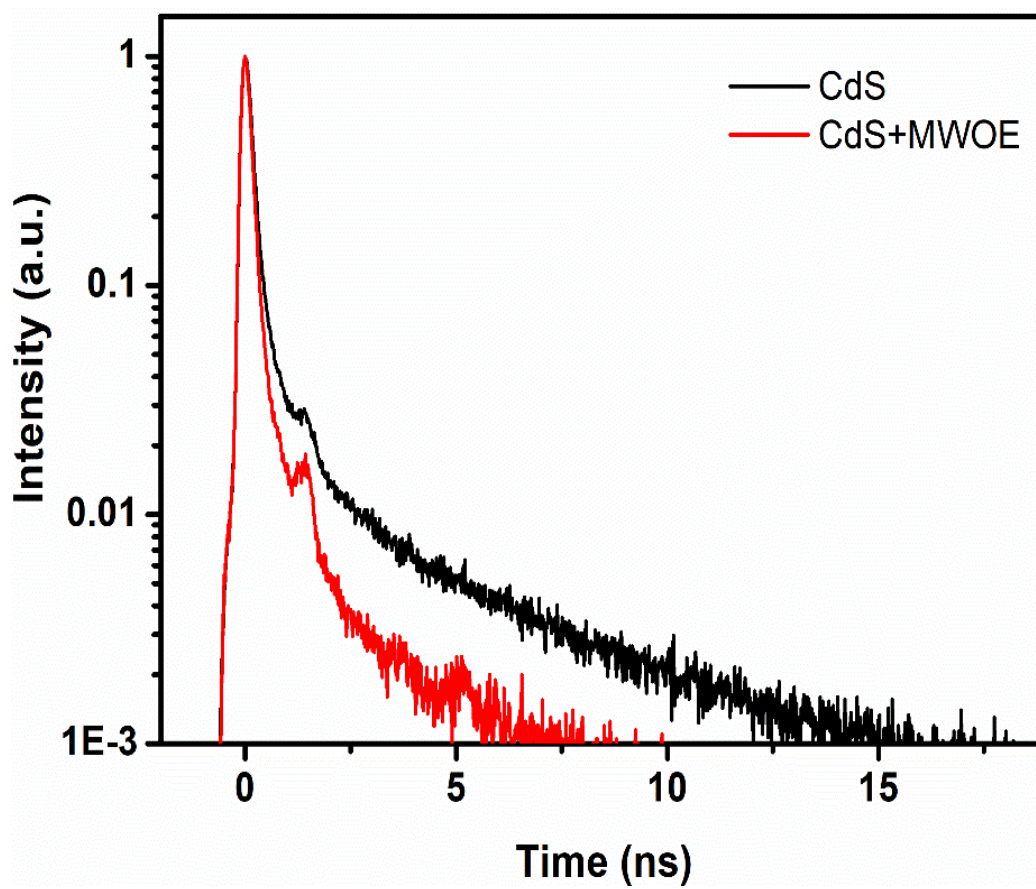

**Figure S4.** Time-resolved photoluminescence spectra of CdS and MWOE/CdS at 560 nm.



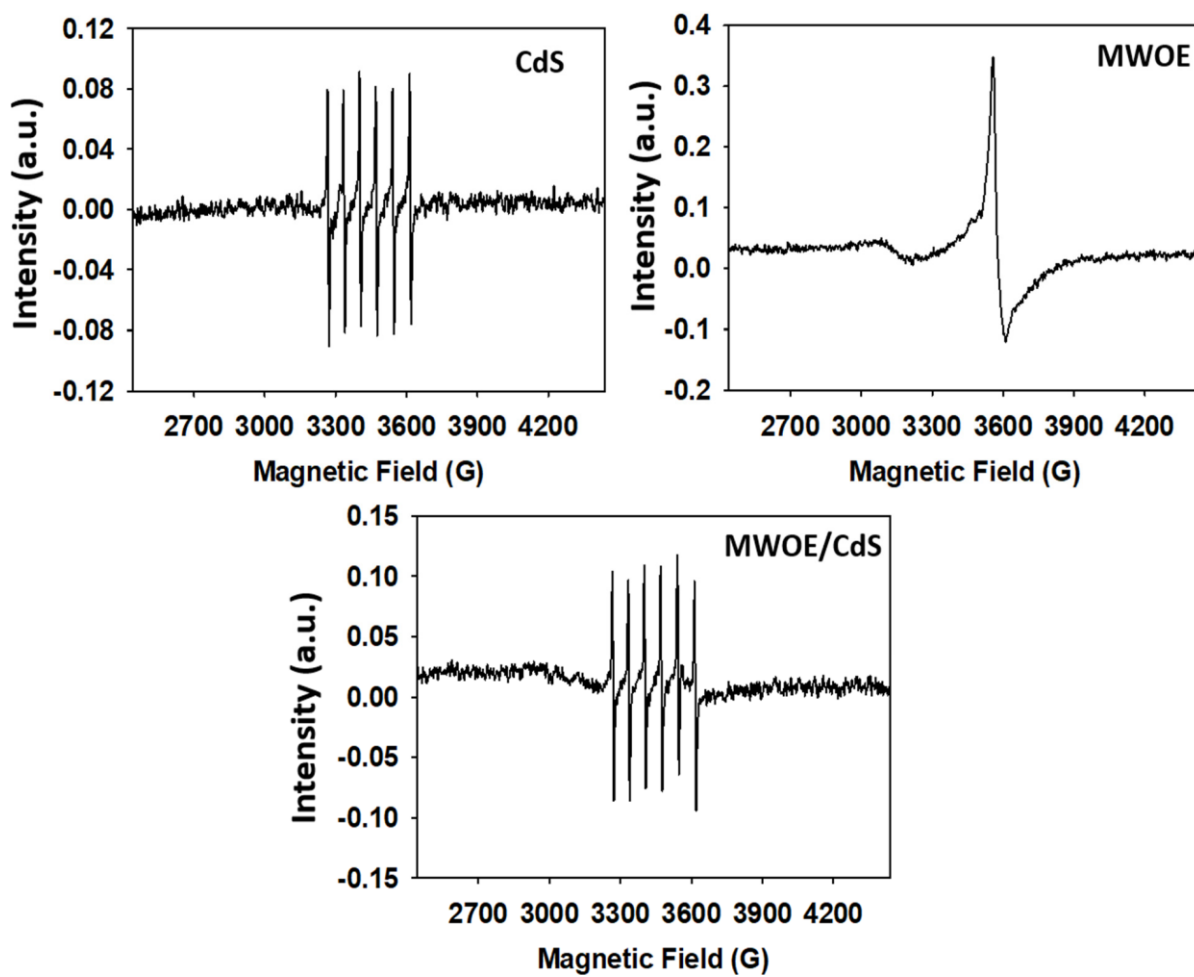

**Figure S5.** ESR spectra of CdS, MWOE and MWOE/CdS.

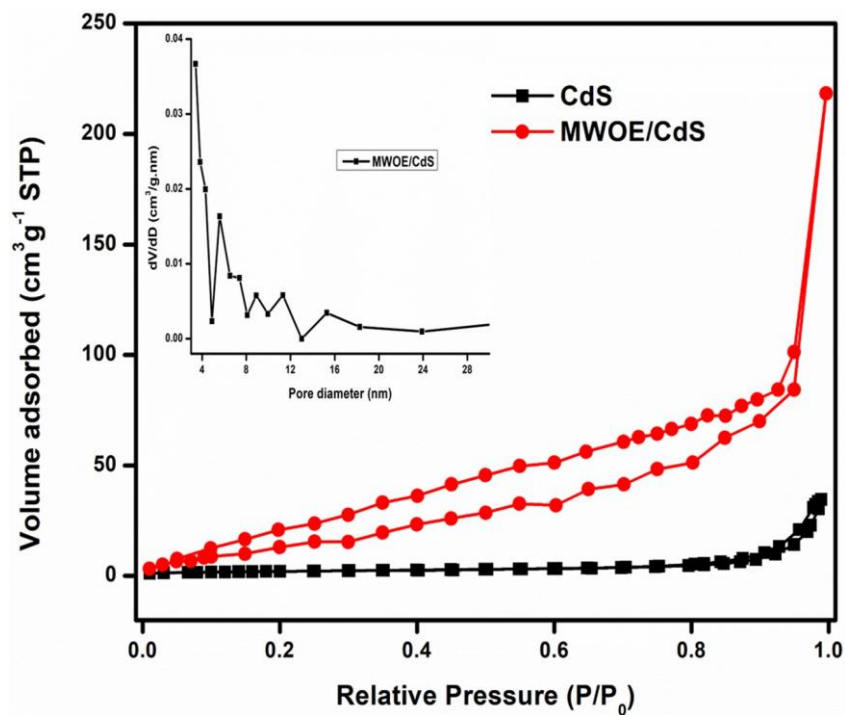

**Figure S6.** N<sub>2</sub> adsorption/desorption isotherms of CdS and MWOE/CdS and the pore-size distribution of MWOE/CdS nanocomposite.

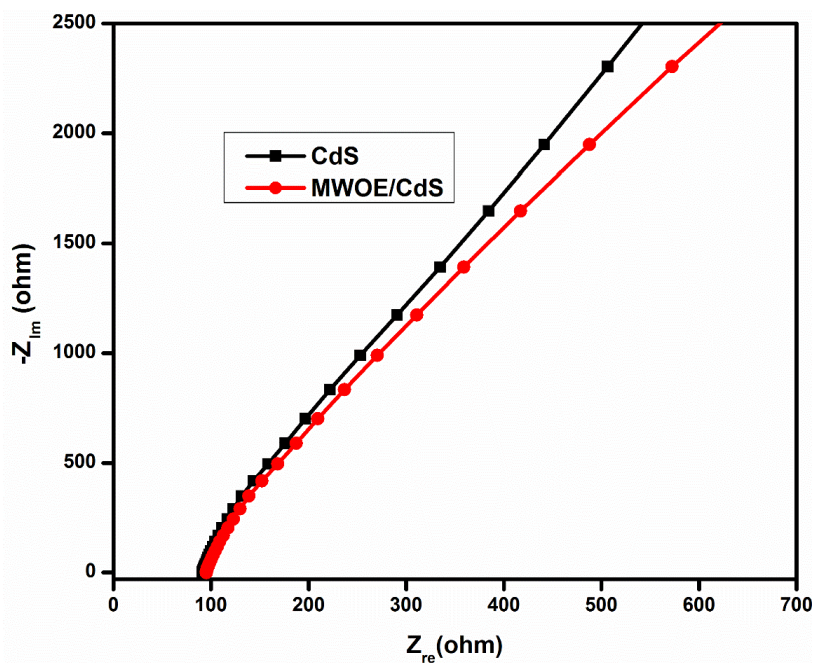

**Figure S7.** Electrochemical impedance measurements of CdS and MWOE/CdS nanocomposites.



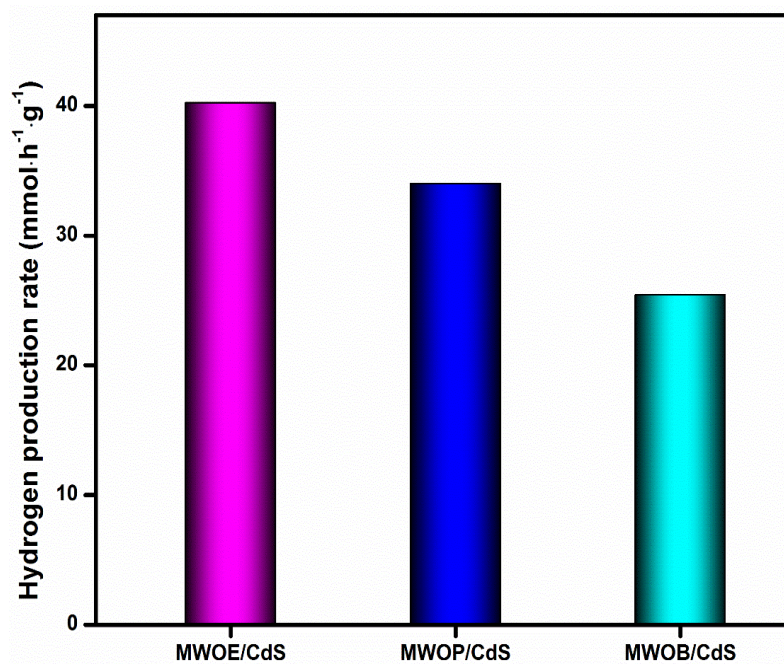

**Figure S8.** The solvent effect on photocatalytic  $\text{H}_2$  production rate.

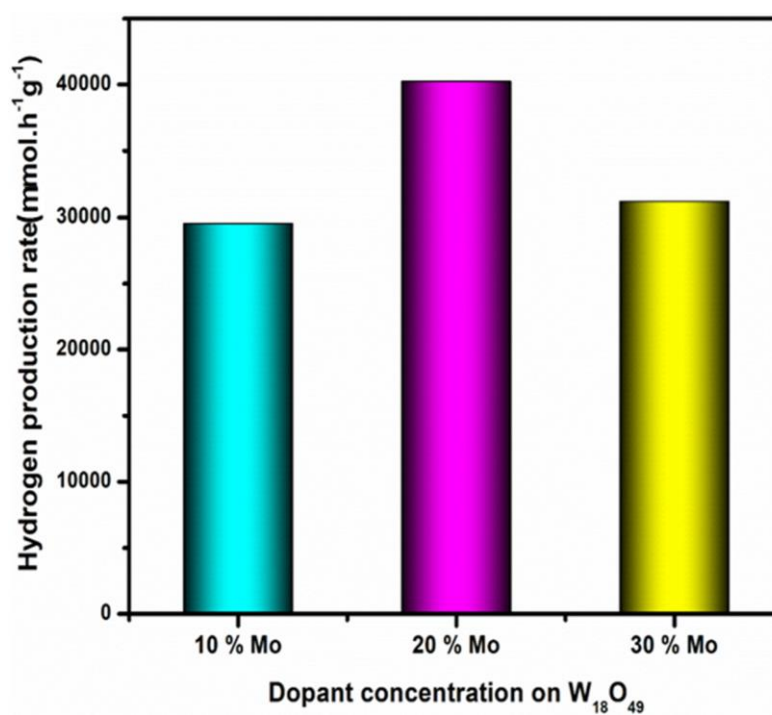

**Figure S9.** The Mo dopant concentration effect on photocatalytic  $\text{H}_2$  production rate.

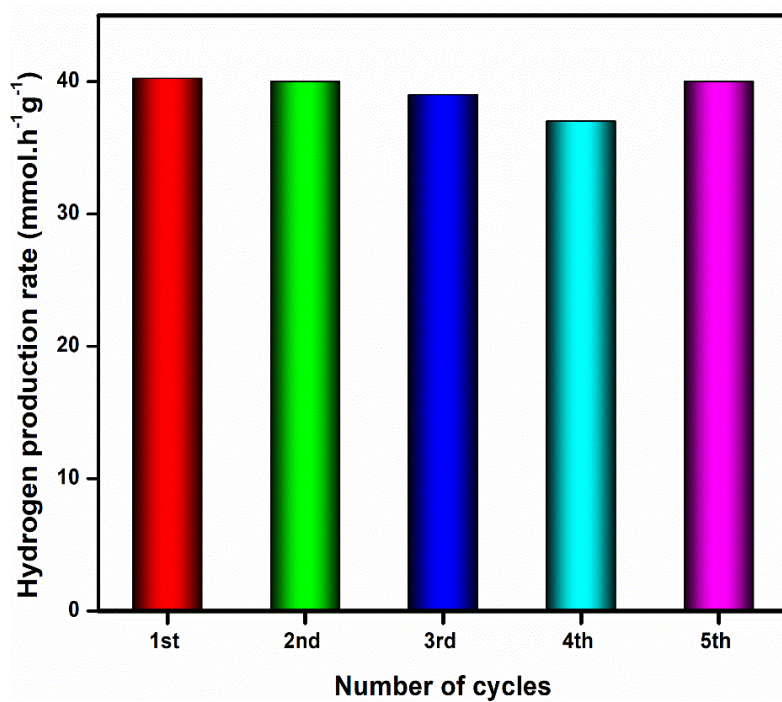

**Figure S10.** Recycling study of MWOE/CdS nanocomposite.

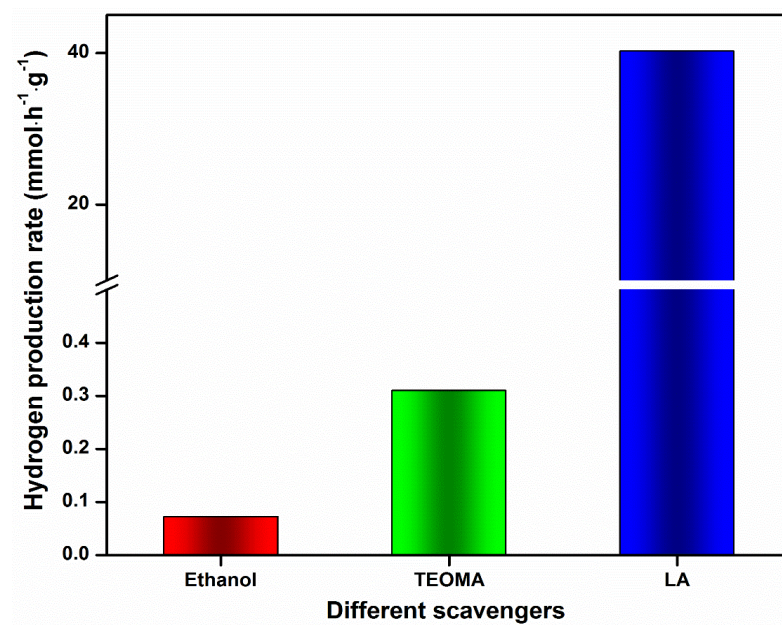

**Figure S11.** The effect of various scavengers on photocatalytic H<sub>2</sub> production rate.

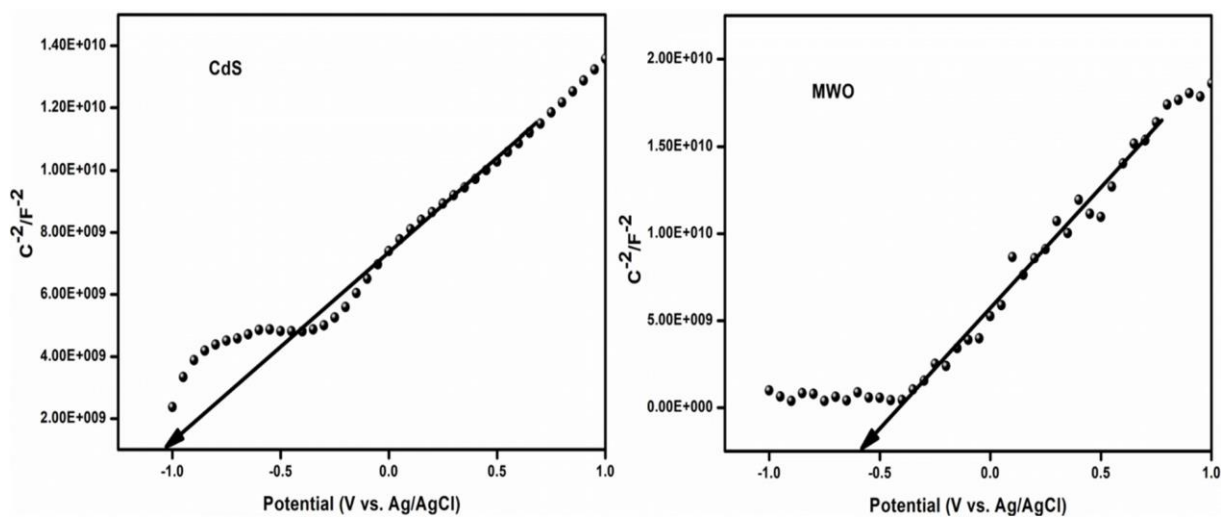

**Figure S12.** Mott–Schottky plots (Potential vs.  $E_{\text{Ag/AgCl}}$ ) of CdS and MWO in 0.5 M  $\text{Na}_2\text{SO}_4$  electrolyte solution.

**Table S1.** Comparisons of photocatalytic H<sub>2</sub> production rate for representative W and Mo oxides based photocatalysts.

| Photocatalyst                                                    | Scavenger                                         | Light source                      | H <sub>2</sub> production rate (μmol·h <sup>-1</sup> ·g <sup>-1</sup> ) | Reference           |
|------------------------------------------------------------------|---------------------------------------------------|-----------------------------------|-------------------------------------------------------------------------|---------------------|
| <b>Mo-W<sub>18</sub>O<sub>49</sub>/CdS</b>                       | <b>Lactic acid</b>                                | <b>150 W Xe lamp (λ ≥ 420 nm)</b> | <b>40,225</b>                                                           | <b>Present work</b> |
| W <sub>18</sub> O <sub>49</sub> /g-C <sub>3</sub> N <sub>4</sub> | Triethanolamine                                   | 300 W Xe lamp (λ ≥ 420 nm)        | 738                                                                     | 2                   |
| α-MoO <sub>3</sub> -WO <sub>3</sub> /CdS                         | Artificial waste water                            | 300 W Xe lamp (λ ≥ 420 nm)        | 8                                                                       | 3                   |
| WO <sub>3</sub> /TiO <sub>2</sub>                                | Ethanol                                           | Hg lamp (λ = 254 nm)              | 9,560                                                                   | 4                   |
| Cs/WO <sub>3</sub>                                               | WO <sub>3</sub> :PEG at 1:1 for thin film         | 250 W Hg lamp (λ = 365–550 nm)    | 3,500                                                                   | 5                   |
| WC-CdS                                                           | Na <sub>2</sub> S/Na <sub>2</sub> SO <sub>3</sub> | 300 W Xe lamp (λ ≥ 420 nm)        | 1,370                                                                   | 6                   |
| MoO <sub>3</sub> -Polymer                                        | Methanol                                          | 300 W Hg lamp (λ = 420 nm)        | 350                                                                     | 7                   |
| Pt-IrO <sub>2</sub> /WO <sub>3</sub>                             | KI solution                                       | Visible light (λ = 400–800 nm)    | 15                                                                      | 8                   |
| CsTaWO <sub>6</sub> /Rh                                          | Methanol                                          | 150 W solar (1 sun irradiation)   | 39                                                                      | 9                   |
| Pt/WO <sub>3</sub> /CdS/TiO <sub>2</sub>                         | Formic acid                                       | 500 W Xe lamp (λ ≥ 420 nm)        | 1,059                                                                   | 10                  |
| CdS/ WO <sub>3</sub>                                             | Lactic acid                                       | 300 W Xe lamp (λ ≥ 420 nm)        | 369                                                                     | 11                  |
| CdS/Au/WO <sub>3</sub>                                           | Na <sub>2</sub> S/Na <sub>2</sub> SO <sub>3</sub> | 300 W Xe lamp (λ ≥ 420 nm)        | 1,500                                                                   | 12                  |
| CdS/Au/U-WO <sub>3</sub>                                         | Na <sub>2</sub> S/Na <sub>2</sub> SO <sub>3</sub> | 300 W Xe lamp (λ ≥ 420 nm)        | 1,390                                                                   | 13                  |

## References

1. M. Gopannagari, D. P. Kumar, D. A. Reddy, S. Hong, M. I. Song and T. K. Kim, *J. Catal.*, 2017, **351**, 153.
2. K. Song, F. Xiao, L. Zhang, F. Yue, X. Liang, J. Wang and X. Sua, *J. Mol. Catal.*, 2016, **418–419**, 95.
3. H. H. El-Maghrabi, H. R. Alib and S. A. Younis, *RSC Adv.*, 2017, **7**, 4409.
4. A. Pérez-Larios and R. Gómez, *Avances Investigación en Ingeniería*, 2013, **10**, 27.
5. G. W. Ho, K. J. Chua and D. R. Siow, *Chem. Eng. J.*, 2012, **181–182**, 661.
6. J. S. Jang, D. J. Ham, N. Lakshminarasimhan, W. Y. Choi and J. S. Lee, *Appl. Catal. A*, 2008, **346**, 149.
7. C. Ma, J. Zhou, Z. Cui, Y. Wang and Z. Zou, *Sol. Energ. Mat. Sol. C.*, 2016, **150**, 102.
8. R. Abe, K. Shinmei, N. Koumura, K. Hara and B. Ohtani, *J. Am. Chem. Soc.*, 2013, **135**, 16872.
9. T. Weller, L. Specht and R. Marschall, *Nano Energy*, 2017, **31**, 551.
10. Y.-L. Chen, S.-L. Lo, H.-L. Chang, H.-M. Yeh, L. Sun and C. Oiu, *Water Sci. Technol.*, 2016, **73**, 1667.
11. L. J. Zhang, S. Li, B. K. Liu, D. J. Wang and T. F. Xie, *ACS Catal.*, 2014, **4**, 3724.
12. X. Cui, Y. Wang, G. Jiang, Z. Zhao, C. Xu, Y. Wei, A. Duan, J. Liu and J. Gao, *RSC Adv.*, 2014, **4**, 15689.
13. X. L. Yin, J. Liu, W.-J. Jiang, X. Zhang, J.-S. Hu and L.-J. Wan, *Chem. Commun.*, 2015, **51**, 13842.
